# Supplementary material for: A potential UV nonlinear-optical crystal with a strong second-harmonic response: RbNa 2 Eu 2 (BO 3 ) 3
Source: Royal Society of Chemistry journal article supplement (doi:10.1039/d4qi03330b), 2025-01-01

## Supporting Information

### **A Potential UV Nonlinear-Optical Crystal with Strong Second-Harmonic Response: $\text{RbNa}_2\text{Eu}_2(\text{BO}_3)_3$**

Dan Li<sup>1</sup>, Jingyu Shang<sup>2</sup>, Ming Gao<sup>3</sup>, Jiangtao Fan<sup>1\*</sup>, Zhanggui Hu<sup>1\*</sup>, Ping Peng<sup>4</sup>,  
Yicheng Wu<sup>1</sup>

1. Tianjin Key Laboratory of Functional Crystal Materials, Institute of Functional Crystal, College of Material Science and Engineering, Tianjin University of Technology, Tianjin 300384, China
2. School of Physics, Harbin Institute of Technology, Harbin 150001, China
3. School of Computational Science and Electronics, Hunan Institute of Engineering, Xiangtan 411104, China
4. School of Materials Science and Engineering, Hunan University, Changsha 410082, China

Corresponding author mail : [fjt7023@163.com](mailto:fjt7023@163.com) (J. Fan), [hu@tjut.edu.cn](mailto:hu@tjut.edu.cn) (Z. Hu)

## Experimental section

Polycrystalline powder synthesis: The RNEBO polycrystalline powder was synthesized by the traditional solid phase method in the Muffle furnace under the condition of not less than 710°C. Firstly,  $\text{Rb}_2\text{CO}_3$  (Sinopharm, 99.9%),  $\text{Eu}_2\text{O}_3$  (Sinopharm, 99.9%),  $\text{H}_3\text{BO}_3$  (Sinopharm, 99.9%),  $\text{Na}_2\text{CO}_3$  (Sinopharm, 99.9%) were mixed evenly and ground with mortar for not less than 30 minutes, and the grinding is taken out several times during sintering to obtain crystals. Powder X-ray diffraction characterization: The pure polycrystalline phase of RNEBO was determined by the traditional Rigaku SmartLab 9 kW diffractometer at room temperature with  $\text{Cu K}\alpha$  radiation ( $\lambda = 1.5418\text{\AA}$ ) as the diffraction parameter. The test range was  $10^\circ$ - $70^\circ$  and the step length rate was  $5^\circ/\text{min}$ . UV spectrum characterization: Hitachi UH4150 spectrophotometer was used to test the UV-VIS diffuse reflection spectrum of RNEBO in the range of 190-2000nm with  $\text{BaSO}_4$  was used as a blank control sample. Infrared spectrum characterization: The functional group behavior of RNEBO was tested with Shimadzu IR spectrometer in the wavelength range of  $500$ - $4000\text{cm}^{-1}$ . Thermal analysis: Thermogravimetric analysis of RNEBO polycrystalline powder was performed at  $25$ - $1200^\circ\text{C}$  with thermal mechanical analyzer (TMA402F3). Energy dispersive spectroscopy: The eds analyses of RNEBO were conducted with thermal field emission scanning electron microscopy (Gemini 500). Powder SHG

characterization: Polycrystalline powder SHG response of RNEBO had been measured by a Q-switched Nd: YAG solid state laser (1064 nm) with using the Kurtz–Perry method. Theoretical calculations were calculated through the CASTEP program by density functional theory (DFT).

**Table S1.** Crystal data and structure refinement for RNEBO.

|                                   |                                                                   |
|-----------------------------------|-------------------------------------------------------------------|
| Chemical formula                  | RbNa <sub>2</sub> Eu <sub>2</sub> (BO <sub>3</sub> ) <sub>3</sub> |
| Formula weight                    | 611.80 g/mol                                                      |
| Crystal system                    | orthorhombic                                                      |
| Temperature                       | 273(2) K                                                          |
| Space group                       | Amm2                                                              |
| Unit cell dimensions              | a = 5.1228(2) Å<br>b = 11.1226(7) Å<br>c = 7.0441(4) Å            |
| Volume, Z                         | 401.36(4) Å <sup>3</sup> , 2                                      |
| Density (calculated)              | 5.062 g/cm <sup>3</sup>                                           |
| Theta range for data collection   | 3.42 to 32.48°                                                    |
| Independent reflections           | R(int) = 0.0371                                                   |
| Refinement method                 | Full-matrix least-squares on F <sup>2</sup>                       |
| Goodness-of-fit on F <sup>2</sup> | 1.149                                                             |
| Final R indices I>2σ(I)           | R1 = 0.0346, wR2 = 0.0884                                         |
| R indices (all data)              | R1 = 0.0348, wR2 = 0.0885                                         |

$$^{[a]}R_1 = \frac{\sum ||F_0| - |F_c||}{\sum |F_0|} \text{ and } wR_2 = \left[ \frac{\sum w(F_0^2 - F_c^2)^2}{\sum w F_0^4} \right]^{1/2} \text{ for } F_0^2 > 2\sigma(F_0^2)$$

**Table S2.** Atomic coordinates and equivalent isotropic atomic displacement parameters ( $\text{\AA}^2$ ) for (RNEBO).

| <b>Atoms</b> | <b>x</b>   | <b>y</b>   | <b>z</b>    | <b>U(eq)</b> |
|--------------|------------|------------|-------------|--------------|
| Eu(1)        | 0.5        | 0.28661(6) | 0.77467(17) | 0.0068(3)    |
| Na(1)        | 0.0        | 0.5        | 0.8714(16)  | 0.0051(12)   |
| Rb(1)        | 0.0        | 0.5        | 0.3821(6)   | 0.0252(8)    |
| Na(2)        | 0.5        | 0.5        | 0.1334(17)  | 0.0051(12)   |
| O(1)         | 0.7628(17) | 0.1596(9)  | 0.5642(15)  | 0.0078(17)   |
| O(2)         | 0.5        | 0.5        | 0.748(4)    | 0.017(5)     |
| O(3)         | 0.5        | 0.3923(12) | 0.463(2)    | 0.0051(12)   |
| O(4)         | 0.0        | 0.3236(17) | 0.695(3)    | 0.020(3)     |
| B(1)         | 0.5        | 0.5        | 0.549(5)    | 0.013(6)     |
| B(2)         | 0.0        | 0.2162(17) | 0.600(3)    | 0.0051(12)   |

**Table S3.** Bond lengths [ $\text{\AA}$ ] and Angles [ $^\circ$ ] for RNEBO. Operators for generating equivalent atoms.

---

|         |           |         |           |
|---------|-----------|---------|-----------|
| Eu1-O2  | 2.381(2)  | Eu1-O3  | 2.394(14) |
| Eu1-O1  | 2.450(10) | Eu1-O1  | 2.450(10) |
| Eu1-O3  | 2.488(15) | Eu1-O1  | 2.516(10) |
| Eu1-O1  | 2.516(10) | Eu1-O4  | 2.655(5)  |
| Eu1-O4  | 2.655(5)  | Eu1-B1  | 2.86(2)   |
| Eu1-B2  | 2.947(11) | Eu1-B2  | 2.947(11) |
| Na1-O4  | 2.323(19) | Na1-O4  | 2.323(19) |
| Na1-O1  | 2.544(12) | Na1-O1  | 2.544(12) |
| Na1-O1  | 2.544(12) | Na1-O1  | 2.544(12) |
| Na1-O2  | 2.706(10) | Na1-O2  | 2.706(10) |
| Na1-B2  | 2.89(2)   | Na1-B2  | 2.89(2)   |
| Na1-Na2 | 3.157(10) | Na1-Na2 | 3.157(10) |
| Rb2-B1  | 2.817(16) | Rb2-B1  | 2.817(16) |
| Rb2-O3  | 2.885(6)  | Rb2-O3  | 2.885(6)  |
| Rb2-O3  | 2.885(6)  | Rb2-O3  | 2.885(6)  |
| Rb2-O4  | 2.95(2)   | Rb2-O4  | 2.95(2)   |
| Rb2-Na2 | 3.103(7)  | Rb2-Na2 | 3.103(7)  |

---

|            |           |           |           |
|------------|-----------|-----------|-----------|
| Rb2-O1     | 3.106(11) | Rb2-O1    | 3.106(11) |
| Na2-O1     | 2.281(10) | Na2-O1    | 2.281(10) |
| Na2-O1     | 2.281(10) | Na2-O1    | 2.281(10) |
| Na2-O3     | 2.615(19) | Na2-O3    | 2.615(19) |
| Na2-O2     | 2.72(3)   | Na2-B1    | 2.92(4)   |
| O1-B2      | 1.392(13) | O2-B1     | 1.40(4)   |
| O3-B1      | 1.34(2)   | O4-B2     | 1.37(3)   |
| <hr/>      |           |           |           |
| Angles [°] |           |           |           |
| <hr/>      |           |           |           |
| O2-Eu1-O3  | 150.8(8)  | O2-Eu1-O1 | 121.7(6)  |
| O3-Eu1-O1  | 81.8(4)   | O2-Eu1-O1 | 121.7(6)  |
| O3-Eu1-O1  | 81.8(4)   | O1-Eu1-O1 | 66.6(4)   |
| O2-Eu1-O3  | 57.2(7)   | O3-Eu1-O3 | 152.0(5)  |
| O1-Eu1-O3  | 74.9(4)   | O1-Eu1-O3 | 74.9(4)   |
| O2-Eu1-O1  | 80.1(6)   | O3-Eu1-O1 | 75.4(4)   |
| O1-Eu1-O1  | 157.1(3)  | O1-Eu1-O1 | 109.5(3)  |
| O3-Eu1-O1  | 127.0(3)  | O2-Eu1-O1 | 80.1(6)   |
| O3-Eu1-O1  | 75.4(4)   | O1-Eu1-O1 | 109.5(3)  |
| O1-Eu1-O1  | 157.1(3)  | O3-Eu1-O1 | 127.0(3)  |
| O1-Eu1-O1  | 64.7(4)   | O2-Eu1-O4 | 80.1(4)   |
| <hr/>      |           |           |           |

---

|           |          |           |          |
|-----------|----------|-----------|----------|
| O3-Eu1-O4 | 104.3(4) | O1-Eu1-O4 | 119.4(4) |
| O1-Eu1-O4 | 55.3(4)  | O3-Eu1-O4 | 74.9(4)  |
| O1-Eu1-O4 | 67.6(4)  | O1-Eu1-O4 | 130.6(4) |
| O2-Eu1-O4 | 80.1(4)  | O3-Eu1-O4 | 104.3(4) |
| O1-Eu1-O4 | 55.3(4)  | O1-Eu1-O4 | 119.4(4) |
| O3-Eu1-O4 | 74.9(4)  | O1-Eu1-O4 | 130.6(4) |
| O1-Eu1-O4 | 67.6(4)  | O4-Eu1-O4 | 149.6(8) |
| O2-Eu1-B1 | 29.3(8)  | O3-Eu1-B1 | 179.9(7) |
| O1-Eu1-B1 | 98.1(6)  | O1-Eu1-B1 | 98.1(6)  |
| O3-Eu1-B1 | 27.9(7)  | O1-Eu1-B1 | 104.7(6) |
| O1-Eu1-B1 | 104.7(6) | O4-Eu1-B1 | 75.7(4)  |
| O4-Eu1-B1 | 75.7(4)  | O2-Eu1-B2 | 103.4(5) |
| O3-Eu1-B2 | 90.6(4)  | O1-Eu1-B2 | 94.1(4)  |
| O1-Eu1-B2 | 28.0(4)  | O3-Eu1-B2 | 76.0(4)  |
| O1-Eu1-B2 | 86.3(4)  | O1-Eu1-B2 | 150.0(5) |
| O4-Eu1-B2 | 27.6(5)  | O4-Eu1-B2 | 142.3(6) |
| B1-Eu1-B2 | 89.3(5)  | O2-Eu1-B2 | 103.4(5) |
| O3-Eu1-B2 | 90.6(4)  | O1-Eu1-B2 | 28.0(4)  |
| O1-Eu1-B2 | 94.1(4)  | O3-Eu1-B2 | 76.0(4)  |

---



---

|           |           |           |           |
|-----------|-----------|-----------|-----------|
| O1-Eu1-B2 | 150.0(5)  | O1-Eu1-B2 | 86.3(4)   |
| O4-Eu1-B2 | 142.3(6)  | O4-Eu1-B2 | 27.6(5)   |
| B1-Eu1-B2 | 89.3(5)   | B2-Eu1-B2 | 120.7(8)  |
| O4-Na1-O4 | 115.2(11) | O4-Na1-O1 | 151.1(2)  |
| O4-Na1-O1 | 72.3(5)   | O4-Na1-O1 | 151.1(2)  |
| O4-Na1-O1 | 72.3(5)   | O1-Na1-O1 | 57.1(4)   |
| O4-Na1-O1 | 72.3(5)   | O4-Na1-O1 | 151.1(2)  |
| O1-Na1-O1 | 115.5(6)  | O1-Na1-O1 | 88.5(5)   |
| O4-Na1-O1 | 72.3(5)   | O4-Na1-O1 | 151.1(2)  |
| O1-Na1-O1 | 88.5(5)   | O1-Na1-O1 | 115.5(6)  |
| O1-Na1-O1 | 57.1(4)   | O4-Na1-O2 | 80.1(4)   |
| O4-Na1-O2 | 80.1(4)   | O1-Na1-O2 | 73.7(4)   |
| O1-Na1-O2 | 128.6(4)  | O1-Na1-O2 | 128.6(4)  |
| O1-Na1-O2 | 73.7(4)   | O4-Na1-O2 | 80.1(4)   |
| O4-Na1-O2 | 80.1(4)   | O1-Na1-O2 | 128.6(4)  |
| O1-Na1-O2 | 73.7(4)   | O1-Na1-O2 | 73.7(4)   |
| O1-Na1-O2 | 128.6(4)  | O2-Na1-O2 | 142.4(13) |
| O4-Na1-B2 | 178.6(8)  | O4-Na1-B2 | 66.2(7)   |
| O1-Na1-B2 | 28.7(2)   | O1-Na1-B2 | 28.7(2)   |

---

---

|            |           |             |          |
|------------|-----------|-------------|----------|
| O1-Na1-B2  | 106.4(6)  | O1-Na1-B2   | 106.4(6) |
| O2-Na1-B2  | 100.3(3)  | O2-Na1-B2   | 100.3(3) |
| O4-Na1-B2  | 66.2(7)   | O4-Na1-B2   | 178.6(8) |
| O1-Na1-B2  | 106.4(6)  | O1-Na1-B2   | 106.4(6) |
| O1-Na1-B2  | 28.7(2)   | O1-Na1-B2   | 28.7(2)  |
| O2-Na1-B2  | 100.3(3)  | O2-Na1-B2   | 100.3(3) |
| B2-Na1-B2  | 112.4(10) | O4-Na1-Na2  | 108.2(3) |
| O4-Na1-Na2 | 108.2(3)  | O1-Na1-Na2  | 45.6(2)  |
| O1-Na1-Na2 | 94.3(4)   | O1-Na1-Na2  | 94.3(4)  |
| O1-Na1-Na2 | 45.6(2)   | O2-Na1-Na2  | 54.6(6)  |
| O2-Na1-Na2 | 163.0(8)  | B2-Na1-Na2  | 71.0(3)  |
| B2-Na1-Na2 | 71.0(3)   | O4-Na1-Na2  | 108.2(3) |
| O4-Na1-Na2 | 108.2(3)  | O1-Na1-Na2  | 94.3(4)  |
| O1-Na1-Na2 | 45.6(2)   | O1-Na1-Na2  | 45.6(2)  |
| O1-Na1-Na2 | 94.3(4)   | O2-Na1-Na2  | 163.0(8) |
| O2-Na1-Na2 | 54.6(6)   | B2-Na1-Na2  | 71.0(3)  |
| B2-Na1-Na2 | 71.0(3)   | Na2-Na1-Na2 | 108.5(5) |
| B1-Rb2-B1  | 130.8(14) | B1-Rb2-O3   | 27.1(4)  |
| B1-Rb2-O3  | 136.4(6)  | B1-Rb2-O3   | 136.4(6) |

---

---

|            |            |            |            |
|------------|------------|------------|------------|
| B1-Rb2-O3  | 27.1(4)    | O3-Rb2-O3  | 157.1(6)   |
| B1-Rb2-O3  | 136.4(6)   | B1-Rb2-O3  | 27.1(4)    |
| O3-Rb2-O3  | 125.2(5)   | O3-Rb2-O3  | 49.0(5)    |
| B1-Rb2-O3  | 27.1(4)    | B1-Rb2-O3  | 136.4(6)   |
| O3-Rb2-O3  | 49.0(5)    | O3-Rb2-O3  | 125.2(5)   |
| O3-Rb2-O3  | 157.1(6)   | B1-Rb2-O4  | 71.9(5)    |
| B1-Rb2-O4  | 71.9(5)    | O3-Rb2-O4  | 97.3(3)    |
| O3-Rb2-O4  | 64.9(3)    | O3-Rb2-O4  | 97.3(3)    |
| O3-Rb2-O4  | 64.9(3)    | B1-Rb2-O4  | 71.9(5)    |
| B1-Rb2-O4  | 71.9(5)    | O3-Rb2-O4  | 64.9(3)    |
| O3-Rb2-O4  | 97.3(3)    | O3-Rb2-O4  | 64.9(3)    |
| O3-Rb2-O4  | 97.3(3)    | O4-Rb2-O4  | 83.4(7)    |
| B1-Rb2-Na2 | 170.2(7)   | B1-Rb2-Na2 | 59.0(7)    |
| O3-Rb2-Na2 | 147.7(3)   | O3-Rb2-Na2 | 51.6(3)    |
| O3-Rb2-Na2 | 51.6(3)    | O3-Rb2-Na2 | 147.7(3)   |
| O4-Rb2-Na2 | 114.93(19) | O4-Rb2-Na2 | 114.93(19) |
| B1-Rb2-Na2 | 59.0(7)    | B1-Rb2-Na2 | 170.2(7)   |
| O3-Rb2-Na2 | 51.6(3)    | O3-Rb2-Na2 | 147.7(3)   |
| O3-Rb2-Na2 | 147.7(3)   | O3-Rb2-Na2 | 51.6(3)    |

---

---

|             |            |            |            |
|-------------|------------|------------|------------|
| O4-Rb2-Na2  | 114.93(19) | O4-Rb2-Na2 | 114.93(19) |
| Na2-Rb2-Na2 | 111.3(4)   | B1-Rb2-O1  | 86.8(6)    |
| B1-Rb2-O1   | 131.0(5)   | O3-Rb2-O1  | 63.8(3)    |
| O3-Rb2-O1   | 136.7(3)   | O3-Rb2-O1  | 104.7(3)   |
| O3-Rb2-O1   | 91.9(3)    | O4-Rb2-O1  | 156.74(17) |
| O4-Rb2-O1   | 99.1(4)    | Na2-Rb2-O1 | 85.2(3)    |
| Na2-Rb2-O1  | 43.1(2)    | B1-Rb2-O1  | 131.0(5)   |
| B1-Rb2-O1   | 86.8(6)    | O3-Rb2-O1  | 104.7(3)   |
| O3-Rb2-O1   | 91.9(3)    | O3-Rb2-O1  | 63.8(3)    |
| O3-Rb2-O1   | 136.7(3)   | O4-Rb2-O1  | 156.74(18) |
| O4-Rb2-O1   | 99.1(4)    | Na2-Rb2-O1 | 43.1(2)    |
| Na2-Rb2-O1  | 85.2(3)    | O1-Rb2-O1  | 46.1(3)    |
| O1-Na2-O1   | 155.3(8)   | O1-Na2-O1  | 72.3(5)    |
| O1-Na2-O1   | 102.2(5)   | O1-Na2-O1  | 102.2(5)   |
| O1-Na2-O1   | 72.3(5)    | O1-Na2-O1  | 155.3(8)   |
| O1-Na2-O3   | 80.4(4)    | O1-Na2-O3  | 123.1(5)   |
| O1-Na2-O3   | 80.4(4)    | O1-Na2-O3  | 123.1(5)   |
| O1-Na2-O3   | 123.1(5)   | O1-Na2-O3  | 80.4(4)    |
| O1-Na2-O3   | 123.1(5)   | O1-Na2-O3  | 80.4(4)    |

---

---

|             |          |            |          |
|-------------|----------|------------|----------|
| O3-Na2-O3   | 54.5(6)  | O1-Na2-O2  | 77.7(4)  |
| O1-Na2-O2   | 77.7(4)  | O1-Na2-O2  | 77.7(4)  |
| O1-Na2-O2   | 77.7(4)  | O3-Na2-O2  | 152.7(3) |
| O3-Na2-O2   | 152.7(3) | O1-Na2-B1  | 102.3(4) |
| O1-Na2-B1   | 102.3(4) | O1-Na2-B1  | 102.3(4) |
| O1-Na2-B1   | 102.3(4) | O3-Na2-B1  | 27.3(3)  |
| O3-Na2-B1   | 27.3(3)  | O2-Na2-B1  | 180.0    |
| O1-Na2-Rb2  | 68.5(3)  | O1-Na2-Rb2 | 127.4(3) |
| O1-Na2-Rb2  | 127.4(3) | O1-Na2-Rb2 | 68.5(3)  |
| O3-Na2-Rb2  | 59.9(2)  | O3-Na2-Rb2 | 59.9(2)  |
| O2-Na2-Rb2  | 124.4(2) | B1-Na2-Rb2 | 55.6(2)  |
| O1-Na2-Rb2  | 127.4(3) | O1-Na2-Rb2 | 68.5(3)  |
| O1-Na2-Rb2  | 68.5(3)  | O1-Na2-Rb2 | 127.4(3) |
| O3-Na2-Rb2  | 59.9(2)  | O3-Na2-Rb2 | 59.9(2)  |
| O2-Na2-Rb2  | 124.4(2) | B1-Na2-Rb2 | 55.6(2)  |
| Rb2-Na2-Rb2 | 111.3(4) | O1-Na2-Na1 | 52.9(3)  |
| O1-Na2-Na1  | 110.7(4) | O1-Na2-Na1 | 110.7(4) |
| O1-Na2-Na1  | 52.9(3)  | O3-Na2-Na1 | 121.3(2) |
| O3-Na2-Na1  | 121.3(2) | O2-Na2-Na1 | 54.2(2)  |

---

---

|             |           |             |           |
|-------------|-----------|-------------|-----------|
| B1-Na2-Na1  | 125.8(2)  | Rb2-Na2-Na1 | 70.14(18) |
| Rb2-Na2-Na1 | 178.6(4)  | O1-Na2-Na1  | 110.7(4)  |
| O1-Na2-Na1  | 52.9(3)   | O1-Na2-Na1  | 52.9(3)   |
| O1-Na2-Na1  | 110.7(4)  | O3-Na2-Na1  | 121.3(2)  |
| O3-Na2-Na1  | 121.3(2)  | O2-Na2-Na1  | 54.2(2)   |
| B1-Na2-Na1  | 125.8(2)  | Rb2-Na2-Na1 | 178.6(4)  |
| Rb2-Na2-Na1 | 70.14(18) | Na1-Na2-Na1 | 108.5(5)  |
| B2-O1-Na2   | 145.9(10) | B2-O1-Eu1   | 96.3(9)   |
| Na2-O1-Eu1  | 89.7(4)   | B2-O1-Eu1   | 120.5(10) |
| Na2-O1-Eu1  | 92.4(4)   | Eu1-O1-Eu1  | 93.4(3)   |
| B2-O1-Na1   | 89.7(9)   | Na2-O1-Na1  | 81.5(4)   |
| Eu1-O1-Na1  | 170.9(5)  | Eu1-O1-Na1  | 89.4(4)   |
| B2-O1-Rb2   | 77.6(9)   | Na2-O1-Rb2  | 68.4(3)   |
| Eu1-O1-Rb2  | 96.2(3)   | Eu1-O1-Rb2  | 158.4(4)  |
| Na1-O1-Rb2  | 78.4(3)   | B1-O2-Eu1   | 94.6(7)   |
| B1-O2-Eu1   | 94.6(7)   | Eu1-O2-Eu1  | 170.8(13) |
| B1-O2-Na1   | 108.8(6)  | Eu1-O2-Na1  | 88.5(3)   |
| Eu1-O2-Na1  | 88.5(3)   | B1-O2-Na1   | 108.8(6)  |
| Eu1-O2-Na1  | 88.5(3)   | Eu1-O2-Na1  | 88.5(3)   |

---

---

|            |           |            |           |
|------------|-----------|------------|-----------|
| Na1-O2-Na1 | 142.4(13) | B1-O2-Na2  | 180.0     |
| Eu1-O2-Na2 | 85.4(7)   | Eu1-O2-Na2 | 85.4(7)   |
| Na1-O2-Na2 | 71.2(6)   | Na1-O2-Na2 | 71.2(6)   |
| B1-O2-Rb2  | 44.8(3)   | Eu1-O2-Rb2 | 93.2(4)   |
| Eu1-O2-Rb2 | 93.2(5)   | Na1-O2-Rb2 | 153.6(9)  |
| Na1-O2-Rb2 | 63.9(4)   | Na2-O2-Rb2 | 135.2(3)  |
| B1-O2-Rb2  | 44.8(3)   | Eu1-O2-Rb2 | 93.2(4)   |
| Eu1-O2-Rb2 | 93.2(4)   | Na1-O2-Rb2 | 63.9(4)   |
| Na1-O2-Rb2 | 153.6(9)  | Na2-O2-Rb2 | 135.2(3)  |
| Rb2-O2-Rb2 | 89.7(6)   | B1-O3-Eu1  | 172.9(17) |
| B1-O3-Eu1  | 91.6(15)  | Eu1-O3-Eu1 | 95.5(5)   |
| B1-O3-Na2  | 89.4(15)  | Eu1-O3-Na2 | 83.5(5)   |
| Eu1-O3-Na2 | 179.0(6)  | B1-O3-Rb2  | 73.6(6)   |
| Eu1-O3-Rb2 | 103.6(3)  | Eu1-O3-Rb2 | 111.8(3)  |
| Na2-O3-Rb2 | 68.5(3)   | B1-O3-Rb2  | 73.6(6)   |
| Eu1-O3-Rb2 | 103.6(3)  | Eu1-O3-Rb2 | 111.8(3)  |
| Na2-O3-Rb2 | 68.5(3)   | Rb2-O3-Rb2 | 125.2(5)  |
| B2-O4-Na1  | 176.8(16) | B2-O4-Eu1  | 88.2(5)   |
| Na1-O4-Eu1 | 91.0(4)   | B2-O4-Eu1  | 88.2(5)   |

---

---

|            |           |            |           |
|------------|-----------|------------|-----------|
| Na1-O4-Eu1 | 91.0(4)   | Eu1-O4-Eu1 | 149.6(8)  |
| B2-O4-Rb2  | 102.5(13) | Na1-O4-Rb2 | 80.7(6)   |
| Eu1-O4-Rb2 | 105.2(4)  | Eu1-O4-Rb2 | 105.2(4)  |
| O4-B2-O1   | 118.9(9)  | O4-B2-O1   | 118.9(9)  |
| O1-B2-O1   | 121.7(16) | O4-B2-Na1  | 175.4(16) |
| O1-B2-Na1  | 61.5(8)   | O1-B2-Na1  | 61.5(8)   |
| O4-B2-Eu1  | 64.2(5)   | O1-B2-Eu1  | 55.7(6)   |
| O1-B2-Eu1  | 162.7(13) | Na1-B2-Eu1 | 116.9(4)  |
| O4-B2-Eu1  | 64.2(5)   | O1-B2-Eu1  | 162.7(13) |
| O1-B2-Eu1  | 55.7(6)   | Na1-B2-Eu1 | 116.9(4)  |
| Eu1-B2-Eu1 | 120.7(8)  | O4-B2-Rb2  | 111.3(15) |
| O1-B2-Rb2  | 76.5(9)   | O1-B2-Rb2  | 76.5(9)   |
| Na1-B2-Rb2 | 73.4(5)   | Eu1-B2-Rb2 | 86.5(5)   |
| Eu1-B2-Rb2 | 86.5(5)   | O4-B2-Rb2  | 55.1(11)  |
| O1-B2-Rb2  | 109.1(9)  | O1-B2-Rb2  | 109.1(9)  |
| Na1-B2-Rb2 | 120.2(8)  | Eu1-B2-Rb2 | 86.8(4)   |
| Eu1-B2-Rb2 | 86.8(4)   | Rb2-B2-Rb2 | 166.4(8)  |
| O3-B1-O3   | 127.(3)   | O3-B1-O2   | 116.6(15) |
| O3-B1-O2   | 116.6(15) | O3-B1-Rb2  | 79.2(8)   |

---



---

|            |            |            |            |
|------------|------------|------------|------------|
| O3-B1-Rb2  | 79.2(8)    | O2-B1-Rb2  | 114.6(7)   |
| O3-B1-Rb2  | 79.2(8)    | O3-B1-Rb2  | 79.2(8)    |
| O2-B1-Rb2  | 114.6(7)   | Rb2-B1-Rb2 | 130.8(14)  |
| O3-B1-Eu1  | 173.(2)    | O3-B1-Eu1  | 60.5(10)   |
| O2-B1-Eu1  | 56.1(6)    | Rb2-B1-Eu1 | 103.41(15) |
| Rb2-B1-Eu1 | 103.41(15) | O3-B1-Eu1  | 60.5(10)   |
| O3-B1-Eu1  | 173.(2)    | O2-B1-Eu1  | 56.1(6)    |
| Rb2-B1-Eu1 | 103.41(15) | Rb2-B1-Eu1 | 103.41(15) |
| Eu1-B1-Eu1 | 112.3(12)  | O3-B1-Na2  | 63.4(15)   |
| O3-B1-Na2  | 63.4(15)   | O2-B1-Na2  | 180.0      |
| Rb2-B1-Na2 | 65.4(7)    | Rb2-B1-Na2 | 65.4(7)    |
| Eu1-B1-Na2 | 123.9(6)   | Eu1-B1-Na2 | 123.9(6)   |

---

#1  $x, y, z-1$    #2  $x-1, y, z$    #3  $x+1, y, z$    #4  $x, y+1/2, z-1/2$   
 #5  $x+1, y+1/2, z-1/2$    #6  $-x+1, -y+1, z-1$    #7  $-x, -y+1, z$   
 #8  $-x+1, -y+1, z$    #9  $-x+2, -y+1, z$    #10  $-x, -y+1/2, z-1/2$   
 #11  $-x+1, -y+1/2, z-1/2$    #12  $-x+2, -y+1/2, z-1/2$    #13  $-x+1, -y+1/2,$   
 $z+1/2$   
 #14  $x+1, y, z-1$    #15  $x, y-1/2, z-1/2$    #16  $x-1, y, z+1$   
 #17  $x-1, y-1/2, z+1/2$    #18  $x, y-1/2, z+1/2$    #19  $x, y, z+1$

#20  $x, y+1/2, z+1/2$     #21  $-x, -y+1/2, z+1/2$     #22  $x+1, -y+1/2, z-1/2$   
#23  $x, -y+1/2, z+1/2$     #24  $x+1, -y+1/2, z+1/2$     #25  $-x, y, z$   
#26  $-x, y+1/2, z-1/2$     #27  $-x+1, y+1/2, z-1/2$     #28  $-x, y+1/2, z+1/2$

Figure S1. The EDS spectrum of RNEBO.

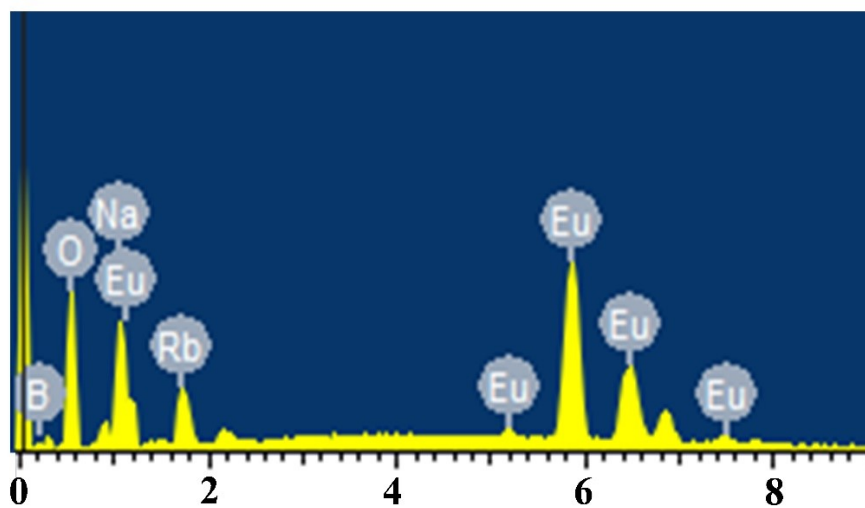

**Figure S2.** The transition of  $\text{Eu}^{3+}$  around 400-600 nm in RNEBO.

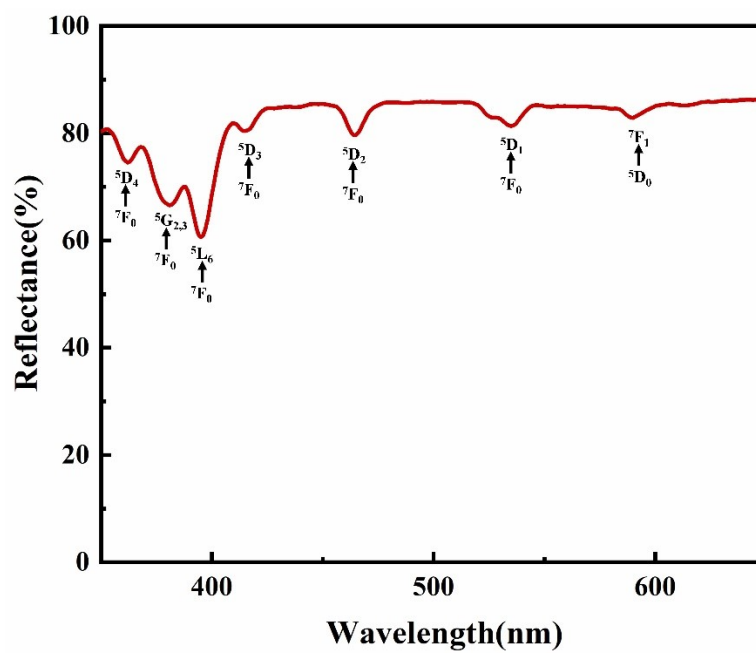

**Figure S3.** The calculated birefringence for RNEBO.

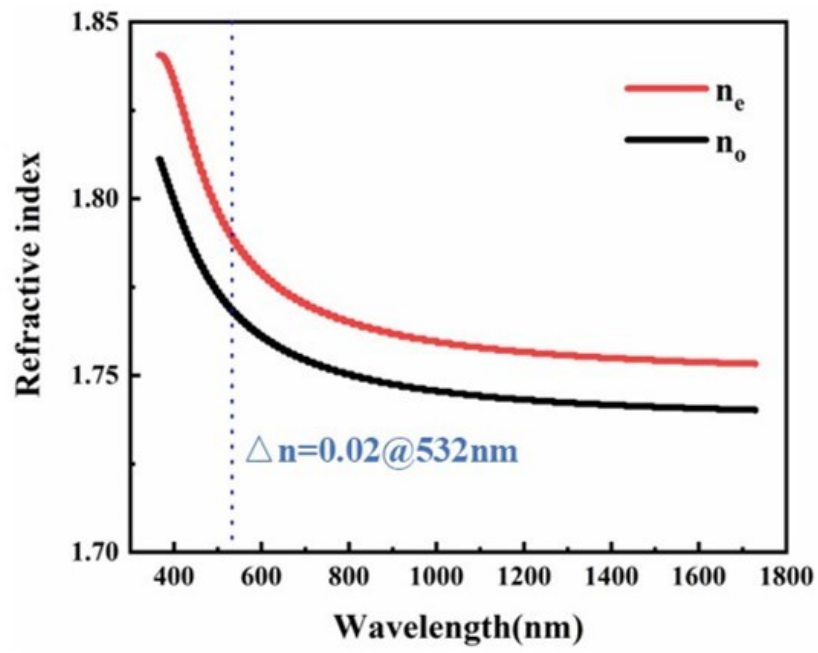

Supplement: d4qi03330b1.pdf [file d4qi03330b1.pdf]
